# Supplementary material for: RuC nanosheet as a promising biosensing material for detecting the aromatic amino acids: a DFT study
Source: Royal Society of Chemistry journal article supplement (doi:10.1039/d4na00670d), 2024-01-01
Supplement: d4na00670d1.pdf [file d4na00670d1.pdf]

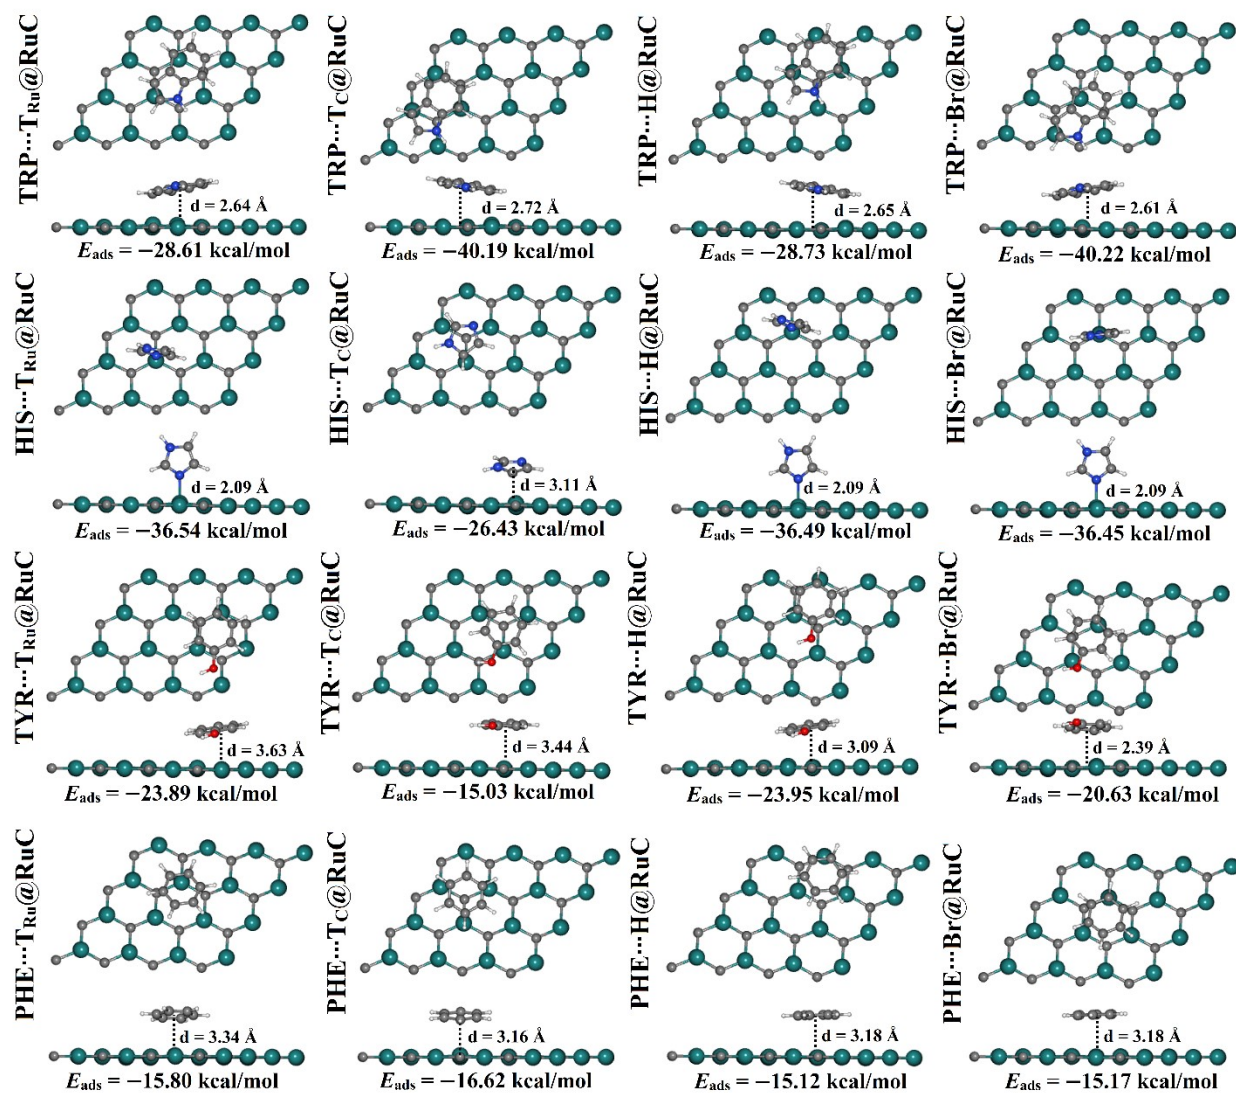

**Figure S1.** Side and top representations of the relaxed AAA...RuC complexes (AAA; tryptophan (TRP), histidine (HIS), tyrosine (TYR), and phenylalanine (PHE)) at all possible adsorption sites on the RuC nanosheet. The adsorption energies ( $E_{ads}$ ) and the equilibrium adsorption distances ( $d$ ) between the AAA molecules and the RuC nanosheet are in kcal/mol and Å, respectively.

**Table S1.** The atomic coordinates of the relaxed AAA···RuC/···GN complexes.

| <i>TRP···RuC</i> |               |               |               |
|------------------|---------------|---------------|---------------|
| Ru               | 0.0243501193  | 0.2460819278  | 0.4194738572  |
| C                | 1.6250885367  | 1.1580986246  | -0.0694209976 |
| Ru               | -1.8066249602 | 3.3792341645  | 0.3826998873  |
| C                | -0.1959694083 | 4.3056317310  | -0.0386756851 |
| Ru               | -3.6384450365 | 6.5554015450  | 0.4050313304  |
| C                | -2.0245205635 | 7.4919014765  | 0.0109384979  |
| Ru               | -5.4403208735 | 9.7064958951  | 0.4257219057  |
| C                | -3.8429461927 | 10.6275337578 | -0.0512782122 |
| Ru               | 3.2867935908  | 0.0279593543  | -0.2866165566 |
| C                | 4.8867054482  | 0.9522604390  | -0.7652644057 |
| Ru               | 1.4702018154  | 3.1620529381  | -0.2882627403 |
| C                | 3.0679836657  | 4.0987865720  | -0.7329208310 |
| Ru               | -0.3302097505 | 6.3710768356  | -0.1089877705 |
| C                | 1.2700891147  | 7.2866670361  | -0.7067912631 |
| Ru               | -2.1815662445 | 9.5003827386  | -0.2576682744 |
| C                | -0.5813589956 | 10.4090988875 | -0.7570922180 |
| Ru               | 6.5529391684  | -0.1827490400 | -0.9859805897 |
| C                | 8.1545087321  | 0.7410691479  | -1.4531163099 |
| Ru               | 4.7369519784  | 2.9547710411  | -0.9900993197 |
| C                | 6.3297083806  | 3.8947107837  | -1.4481559761 |
| Ru               | 2.9617594063  | 6.1478510366  | -0.8556287732 |
| C                | 4.5329618951  | 7.0499266379  | -1.4404451100 |
| Ru               | 1.0923750311  | 9.2853893252  | -0.9994042500 |
| C                | 2.6990584598  | 10.1978228896 | -1.4627018130 |
| Ru               | 9.8219653241  | -0.3957097979 | -1.6818403480 |
| C                | 11.4179171282 | 0.5214396439  | -2.1805995813 |
| Ru               | 8.0036569017  | 2.7556652931  | -1.6723756021 |
| C                | 9.5888647444  | 3.6779620749  | -2.1781465978 |
| Ru               | 6.1870696088  | 5.9045651727  | -1.6976017818 |
| C                | 7.7731140034  | 6.8326479367  | -2.1831845161 |
| Ru               | 4.3624609663  | 9.0644163366  | -1.7025603992 |
| C                | 5.9609127170  | 9.9832357636  | -2.1611502937 |
| N                | 0.3236768861  | 4.7924510169  | 2.9518443428  |
| C                | 0.4992145875  | 6.8663199576  | 2.0470469470  |
| C                | 1.8253434822  | 6.2806293674  | 2.1372036290  |
| C                | 1.6735115159  | 4.9718356088  | 2.6421601002  |
| C                | -0.3811678410 | 5.8928646789  | 2.5789211994  |
| C                | 3.0965446978  | 6.7057149470  | 1.6881273462  |
| C                | 2.7341359303  | 4.0620042068  | 2.7255889452  |
| C                | 4.1732435414  | 5.8026343881  | 1.8070869968  |
| C                | 3.9913238733  | 4.5053865486  | 2.3146492481  |
| H                | -1.4494574146 | 5.9631730436  | 2.7538206046  |
| H                | -0.1025894783 | 3.8860743798  | 3.1291376536  |
| H                | 3.2756654803  | 7.7461630536  | 1.4210277712  |

|                         |               |               |               |
|-------------------------|---------------|---------------|---------------|
| H                       | 2.5875530716  | 3.0483139564  | 3.0984136477  |
| H                       | 5.1695263145  | 6.1247424642  | 1.5053580836  |
| H                       | 4.8395235879  | 3.8225623645  | 2.3531119198  |
| H                       | 0.2775540539  | 7.9288958488  | 2.0272843021  |
| <b><i>HIS...RuC</i></b> |               |               |               |
| Ru                      | -0.2202035667 | 0.0303643653  | 0.3299492252  |
| C                       | 1.3781580448  | 0.9476873821  | -0.1563239929 |
| Ru                      | -2.0318099954 | 3.1864389717  | 0.3386012508  |
| C                       | -0.4393358404 | 4.1057045147  | -0.1578261502 |
| Ru                      | -3.8588157677 | 6.3335670816  | 0.3289117135  |
| C                       | -2.2668160033 | 7.2597155985  | -0.1601340706 |
| Ru                      | -5.6819108050 | 9.4815435830  | 0.3181111396  |
| C                       | -4.0824152901 | 10.4061391100 | -0.1399777793 |
| Ru                      | 3.0449522255  | -0.1909204772 | -0.3687250667 |
| C                       | 4.6439318292  | 0.7271084935  | -0.8534870818 |
| Ru                      | 1.2256694189  | 2.9493449735  | -0.3796842148 |
| C                       | 2.8409488997  | 3.8648211017  | -0.8091417473 |
| Ru                      | -0.6101448436 | 6.1259658493  | -0.3853627510 |
| C                       | 0.9912065512  | 7.0659150205  | -0.8163586154 |
| Ru                      | -2.4194580647 | 9.2726979898  | -0.3702417294 |
| C                       | -0.8257413174 | 10.1988044147 | -0.8566794727 |
| Ru                      | 6.3107727846  | -0.3987576153 | -1.0796194840 |
| C                       | 7.9147935718  | 0.5262218081  | -1.5481967268 |
| Ru                      | 4.5000495044  | 2.7351107197  | -1.0716623029 |
| C                       | 6.0956739423  | 3.6726351839  | -1.5451943723 |
| Ru                      | 2.7101865115  | 5.9238172427  | -0.9164765091 |
| C                       | 4.3007496872  | 6.8393674841  | -1.5275633276 |
| Ru                      | 0.8407343968  | 9.0683634077  | -1.0769281372 |
| C                       | 2.4535477081  | 9.9794508814  | -1.5454251550 |
| Ru                      | 9.5798868054  | -0.6108967736 | -1.7713582273 |
| C                       | 11.1803255114 | 0.3124671191  | -2.2418045719 |
| Ru                      | 7.7630715723  | 2.5367147281  | -1.7723764862 |
| C                       | 9.3624823692  | 3.4616682745  | -2.2426969913 |
| Ru                      | 5.9492016019  | 5.6876684139  | -1.7780703513 |
| C                       | 7.5435755942  | 6.6087355523  | -2.2599266001 |
| Ru                      | 4.1243536469  | 8.8456712812  | -1.7790276131 |
| C                       | 5.7188391530  | 9.7667982082  | -2.2600505675 |
| N                       | 3.1806282185  | 7.0079153103  | 3.1396127948  |
| N                       | 3.1293811058  | 6.1695377736  | 1.1154036203  |
| C                       | 4.0094055924  | 5.9019764761  | 3.1555444864  |
| C                       | 3.9718628144  | 5.3871628118  | 1.8866642305  |
| C                       | 2.6647179203  | 7.1456772442  | 1.8941891640  |
| H                       | 2.9830230167  | 7.6202698897  | 3.9235644443  |
| H                       | 4.4781540079  | 4.5245637489  | 1.4684243139  |
| H                       | 1.9841614208  | 7.9304463918  | 1.5821272535  |
| H                       | 4.5404610671  | 5.5867334647  | 4.0445164589  |

**TYR---RuC**

|    |               |               |               |
|----|---------------|---------------|---------------|
| Ru | 0.6191477680  | 0.2688764074  | 0.3374833404  |
| C  | 2.2221910971  | 1.1926610447  | -0.1436235147 |
| Ru | -1.2000585433 | 3.4358427673  | 0.3464831790  |
| C  | 0.4129640094  | 4.3645549065  | -0.0699405362 |
| Ru | -3.0088381871 | 6.5866030932  | 0.3648356014  |
| C  | -1.4102647847 | 7.5109685473  | -0.1155580019 |
| Ru | -4.8296799337 | 9.7285831477  | 0.3572282533  |
| C  | -3.2312897826 | 10.6551104288 | -0.1104638835 |
| Ru | 3.8981783325  | 0.0580272173  | -0.3411372079 |
| C  | 5.4918136123  | 0.9930558487  | -0.8179533976 |
| Ru | 2.0991869551  | 3.2381057272  | -0.2427414711 |
| C  | 3.6801612550  | 4.1468114862  | -0.8300302523 |
| Ru | 0.2558660892  | 6.3771873662  | -0.3252292980 |
| C  | 1.8541538743  | 7.2941037656  | -0.8154760405 |
| Ru | -1.5621505550 | 9.5202234090  | -0.3389668015 |
| C  | 0.0354876464  | 10.4457899833 | -0.8142680096 |
| Ru | 7.1595685030  | -0.1465306742 | -1.0428551647 |
| C  | 8.7560119744  | 0.7764197057  | -1.5169374007 |
| Ru | 5.3506186305  | 3.0054186434  | -1.0560317825 |
| C  | 6.9455883947  | 3.9268185621  | -1.5262439070 |
| Ru | 3.5186232040  | 6.1596869837  | -1.0681486456 |
| C  | 5.1192259533  | 7.0791025704  | -1.5339544450 |
| Ru | 1.7029217861  | 9.3083006290  | -1.0419745502 |
| C  | 3.3021738631  | 10.2306501045 | -1.5180344837 |
| Ru | 10.4223465685 | -0.3594511489 | -1.7428745773 |
| C  | 12.0173800879 | 0.5625333007  | -2.2351972722 |
| Ru | 8.6080543057  | 2.7897478289  | -1.7469673584 |
| C  | 10.1993426662 | 3.7161205290  | -2.2305062750 |
| Ru | 6.7869289770  | 5.9386327526  | -1.7549421367 |
| C  | 8.3859616132  | 6.8614170031  | -2.2206004568 |
| Ru | 4.9665322268  | 9.0879392183  | -1.7497573665 |
| C  | 6.5647843440  | 10.0081125837 | -2.2312877901 |
| O  | 1.3241205341  | 1.3338764457  | 2.8534580742  |
| C  | 5.0318503263  | 3.1562605022  | 2.3083035224  |
| C  | 3.8779106895  | 3.9251735512  | 2.1971156300  |
| C  | 4.9217640560  | 1.7870011193  | 2.5943343062  |
| C  | 2.5987616613  | 3.3374993175  | 2.3262126288  |
| C  | 3.6760340607  | 1.1881823915  | 2.7783604468  |
| C  | 2.5169444189  | 1.9678615058  | 2.6742375050  |
| H  | 3.9442292836  | 4.9931119933  | 1.9900649592  |
| H  | 5.8206911343  | 1.1747843890  | 2.6688393950  |
| H  | 1.7125869011  | 3.9702444223  | 2.3977026985  |
| H  | 3.5810798652  | 0.1285811238  | 3.0126618788  |
| H  | 0.5807352356  | 1.9386007296  | 2.6423013617  |
| H  | 6.0113538818  | 3.6161617705  | 2.1832222466  |

**PHE...RuC**

|    |               |               |               |
|----|---------------|---------------|---------------|
| Ru | -0.1150295614 | -0.0650656235 | 0.2636293804  |
| C  | 1.4930324220  | 0.8531367667  | -0.1800929874 |
| Ru | -1.9413844103 | 3.0988929962  | 0.2646669529  |
| C  | -0.3413099830 | 4.0323387280  | -0.1775296183 |
| Ru | -3.7643404915 | 6.2442605017  | 0.2684174482  |
| C  | -2.1727448720 | 7.1700460869  | -0.2237091788 |
| Ru | -5.5790845334 | 9.3872270206  | 0.2679243282  |
| C  | -3.9815760811 | 10.3022398592 | -0.2250522892 |
| Ru | 3.1458974867  | -0.2980152142 | -0.4528732038 |
| C  | 4.7413828888  | 0.6383626605  | -0.9104014761 |
| Ru | 1.3560120113  | 2.8934845213  | -0.3227052217 |
| C  | 2.9227546842  | 3.7972872658  | -0.9419054099 |
| Ru | -0.5120383255 | 6.0392247908  | -0.4501360445 |
| C  | 1.0964755420  | 6.9517983730  | -0.9102849156 |
| Ru | -2.3146819932 | 9.1763081952  | -0.4488551745 |
| C  | -0.7123589167 | 10.1010791827 | -0.9176103332 |
| Ru | 6.4138115690  | -0.4900200829 | -1.1345569219 |
| C  | 8.0132785950  | 0.4365485841  | -1.6048723380 |
| Ru | 4.5933012112  | 2.6574628263  | -1.1452790980 |
| C  | 6.1885508006  | 3.5826934228  | -1.6139607270 |
| Ru | 2.7698296462  | 5.8147905288  | -1.1473140374 |
| C  | 4.3687489389  | 6.7343901992  | -1.6145644185 |
| Ru | 0.9548315706  | 8.9650825912  | -1.1347305764 |
| C  | 2.5563477277  | 9.8878169272  | -1.6053921779 |
| Ru | 9.6843543972  | -0.7002430306 | -1.8281306858 |
| C  | 11.2816323199 | 0.2218545654  | -2.3083782277 |
| Ru | 7.8576212049  | 2.4469998040  | -1.8384234123 |
| C  | 9.4529424408  | 3.3703634452  | -2.3244536719 |
| Ru | 6.0339881747  | 5.5946766509  | -1.8523403938 |
| C  | 7.6321890896  | 6.5172067418  | -2.3135538086 |
| Ru | 4.2198163125  | 8.7475217089  | -1.8386805170 |
| C  | 5.8171262634  | 9.6670399577  | -2.3249957414 |
| C  | 4.3963911546  | 4.6079644046  | 2.1322098215  |
| C  | 3.1939981075  | 5.3221036936  | 2.1734292037  |
| C  | 4.3919745048  | 3.2091557574  | 2.1728881418  |
| C  | 1.9810733263  | 4.6358024888  | 2.2512960601  |
| C  | 3.1802067217  | 2.5209532704  | 2.2520231345  |
| C  | 1.9617543493  | 3.2273093852  | 2.2700466437  |
| H  | 3.2028721992  | 6.4120086723  | 2.1470958579  |
| H  | 5.3313502169  | 2.6563798085  | 2.1470170447  |
| H  | 1.0403653856  | 5.1860332777  | 2.2799596806  |
| H  | 3.1688204290  | 1.4311729576  | 2.2809092998  |
| H  | 5.3424896434  | 5.1445854615  | 2.0531438431  |
| H  | 1.0242218324  | 2.6959018714  | 2.4418467652  |

AAA...GN Complexes

*TRP...GN*

|   |               |              |              |
|---|---------------|--------------|--------------|
| C | 1.2199482047  | 0.7071500660 | 0.3715137954 |
| C | -0.0128543995 | 1.4188478821 | 0.3695699798 |
| C | -0.0128032413 | 2.8414955667 | 0.3555829616 |
| C | -1.2448815430 | 3.5525076331 | 0.3634347762 |
| C | -1.2448342653 | 4.9754565634 | 0.3636906963 |
| C | -2.4773729606 | 5.6870275510 | 0.3780359965 |
| C | -2.4777954982 | 7.1105761691 | 0.3800177027 |
| C | -3.7103539358 | 7.8226782871 | 0.3815219072 |
| C | 3.6840260389  | 0.7065636482 | 0.3663652449 |
| C | 2.4520980768  | 1.4184252859 | 0.3599160294 |
| C | 2.4515479182  | 2.8412863271 | 0.3478372125 |
| C | 1.2194552435  | 3.5528377232 | 0.3445175072 |
| C | 1.2191140360  | 4.9751146773 | 0.3448440973 |
| C | -0.0127481668 | 5.6866245993 | 0.3555037655 |
| C | -0.0130570986 | 7.1095554714 | 0.3676191283 |
| C | -1.2452372161 | 7.8222858322 | 0.3737296166 |
| C | 6.1488878099  | 0.7060545784 | 0.3765819986 |
| C | 4.9163419303  | 1.4177520830 | 0.3673174280 |
| C | 4.9159727973  | 2.8407202956 | 0.3634355380 |
| C | 3.6835194281  | 3.5521376573 | 0.3516289565 |
| C | 3.6832842274  | 4.9751185927 | 0.3573209118 |
| C | 2.4511158350  | 5.6865489245 | 0.3532142240 |
| C | 2.4515922779  | 7.1096588544 | 0.3690816762 |
| C | 1.2192022867  | 7.8214392662 | 0.3727582886 |
| C | 8.6147015043  | 0.7066174140 | 0.3791069029 |
| C | 7.3818110596  | 1.4178105677 | 0.3790881632 |
| C | 7.3823445044  | 2.8411240809 | 0.3751752423 |
| C | 6.1488531214  | 3.5519498986 | 0.3741328701 |
| C | 6.1493168887  | 4.9755150756 | 0.3792071198 |
| C | 4.9160642392  | 5.6870287122 | 0.3753204641 |
| C | 4.9167954571  | 7.1106655450 | 0.3811588370 |
| C | 3.6839445330  | 7.8220601723 | 0.3787505574 |
| N | 4.0058114294  | 4.0853579295 | 3.7626040804 |
| C | 3.0287124990  | 2.0564182315 | 3.8121020198 |
| C | 1.9963516253  | 3.0531656098 | 3.8347381803 |
| C | 2.6454906260  | 4.3251702689 | 3.7997382662 |
| C | 4.2322195277  | 2.7199806011 | 3.7622445067 |
| C | 0.5902809010  | 3.0139474788 | 3.8571381848 |
| C | 1.9347304524  | 5.5295430942 | 3.7919145722 |
| C | -0.1188273990 | 4.2099744162 | 3.8453152847 |
| C | 0.5450175509  | 5.4547188756 | 3.8151092366 |
| H | 5.2446571036  | 2.3314072225 | 3.7169804617 |
| H | 4.7229997039  | 4.7947582315 | 3.6733578256 |
| H | 0.0655036077  | 2.0569455917 | 3.8688280282 |

|                        |               |              |              |
|------------------------|---------------|--------------|--------------|
| H                      | 2.4470701342  | 6.4922150362 | 3.7518158211 |
| H                      | -1.2098433556 | 4.1893797469 | 3.8481930409 |
| H                      | -0.0402198155 | 6.3750962148 | 3.7949266796 |
| H                      | 2.8984353154  | 0.9788694492 | 3.8184762156 |
| <b><i>HIS...GN</i></b> |               |              |              |
| C                      | 1.0322254676  | 0.8652713286 | 0.6252574906 |
| C                      | -0.2005075678 | 1.5771921216 | 0.6258593487 |
| C                      | -0.2008564946 | 3.0005875238 | 0.6258986387 |
| C                      | -1.4336541517 | 3.7120493923 | 0.6229820994 |
| C                      | -1.4333950267 | 5.1350532956 | 0.6245687050 |
| C                      | -2.6658308813 | 5.8460684395 | 0.6210472364 |
| C                      | -2.6652719109 | 7.2691363271 | 0.6241078590 |
| C                      | -3.8976249585 | 7.9808736789 | 0.6247248879 |
| C                      | 3.4982027079  | 0.8657612039 | 0.6128440430 |
| C                      | 2.2652900218  | 1.5771585553 | 0.6179689836 |
| C                      | 2.2654719010  | 3.0008383130 | 0.6128380348 |
| C                      | 1.0321814104  | 3.7121288853 | 0.6228640494 |
| C                      | 1.0321602353  | 5.1354169059 | 0.6239842307 |
| C                      | -0.2007486212 | 5.8466317439 | 0.6264498119 |
| C                      | -0.2001807796 | 7.2699050460 | 0.6237862837 |
| C                      | -1.4327432229 | 7.9813351297 | 0.6220514941 |
| C                      | 5.9623448052  | 0.8660667238 | 0.6101918575 |
| C                      | 4.7303654943  | 1.5777599522 | 0.6027714456 |
| C                      | 4.7306589557  | 3.0006794248 | 0.5968045825 |
| C                      | 3.4983375241  | 3.7120582472 | 0.6014480268 |
| C                      | 3.4980737417  | 5.1350405887 | 0.6089810065 |
| C                      | 2.2652655671  | 5.8466583980 | 0.6196075613 |
| C                      | 2.2649327686  | 7.2700234615 | 0.6223538788 |
| C                      | 1.0323188544  | 7.9820336234 | 0.6200066270 |
| C                      | 8.4267935896  | 0.8657421932 | 0.6231302037 |
| C                      | 7.1943175896  | 1.5777134335 | 0.6147446553 |
| C                      | 7.1939749770  | 3.0006973886 | 0.6130552451 |
| C                      | 5.9622707924  | 3.7122056178 | 0.6032017320 |
| C                      | 5.9624030980  | 5.1345052525 | 0.6110050308 |
| C                      | 4.7306543678  | 5.8460814196 | 0.6128300506 |
| C                      | 4.7300161185  | 7.2692047894 | 0.6219419161 |
| C                      | 3.4975630746  | 7.9813626418 | 0.6230082309 |
| N                      | 3.7146311078  | 2.7503590662 | 3.9338829948 |
| N                      | 5.5472496607  | 4.0084267676 | 4.0358708895 |
| C                      | 4.7791785725  | 1.8736062305 | 4.0048416128 |
| C                      | 5.8990849390  | 2.6719059352 | 4.0698356499 |
| C                      | 4.2264640661  | 4.0208966770 | 3.9522341200 |
| H                      | 2.7375450089  | 2.4940109774 | 3.8361542144 |
| H                      | 6.9372009367  | 2.3602570413 | 4.1314149594 |
| H                      | 3.5968921799  | 4.9038471146 | 3.8938119841 |
| H                      | 4.6398290806  | 0.7986901436 | 3.9921103280 |

**TYR...GN**

|   |               |              |              |
|---|---------------|--------------|--------------|
| C | 1.2432143961  | 0.8708329220 | 0.2526740646 |
| C | 0.0110501034  | 1.5816544328 | 0.2522637447 |
| C | 0.0116428304  | 3.0045796791 | 0.2464812128 |
| C | -1.2211391721 | 3.7161976600 | 0.2691232672 |
| C | -1.2216214734 | 5.1398835100 | 0.2747684350 |
| C | -2.4546504957 | 5.8514735481 | 0.2827410376 |
| C | -2.4547010570 | 7.2749743970 | 0.2778163785 |
| C | -3.6871730604 | 7.9867268393 | 0.2710679147 |
| C | 3.7074459722  | 0.8709596117 | 0.2594264843 |
| C | 2.4754837801  | 1.5824948002 | 0.2422940266 |
| C | 2.4758581022  | 3.0050930496 | 0.2297102779 |
| C | 1.2437801432  | 3.7164469510 | 0.2318810884 |
| C | 1.2435492983  | 5.1394120684 | 0.2425422721 |
| C | 0.0113901592  | 5.8511716972 | 0.2641568634 |
| C | 0.0105376793  | 7.2746886231 | 0.2728978565 |
| C | -1.2221152332 | 7.9867152824 | 0.2731579679 |
| C | 6.1727667204  | 0.8703942766 | 0.2759005751 |
| C | 4.9399764094  | 1.5822827201 | 0.2653689491 |
| C | 4.9396408392  | 3.0051915852 | 0.2588626530 |
| C | 3.7076849469  | 3.7165951249 | 0.2400551654 |
| C | 3.7078016084  | 5.1392846626 | 0.2484869703 |
| C | 2.4756575846  | 5.8508956231 | 0.2492747203 |
| C | 2.4757482606  | 7.2741640203 | 0.2671599399 |
| C | 1.2431172896  | 7.9861185457 | 0.2732330228 |
| C | 8.6388032183  | 0.8702983360 | 0.2682772345 |
| C | 7.4059411586  | 1.5813249689 | 0.2757514673 |
| C | 7.4054084370  | 3.0047234084 | 0.2780070730 |
| C | 6.1722722869  | 3.7163515573 | 0.2753930073 |
| C | 6.1725671003  | 5.1396872408 | 0.2789108026 |
| C | 4.9397849398  | 5.8511468502 | 0.2694529777 |
| C | 4.9404809604  | 7.2745936729 | 0.2729411392 |
| C | 3.7081704009  | 7.9862586052 | 0.2709344359 |
| O | -0.0871625646 | 2.1172034152 | 3.6089143943 |
| C | 3.7344311807  | 3.7891692768 | 3.7305400562 |
| C | 2.6206691686  | 4.6292604293 | 3.6674946657 |
| C | 3.5479236108  | 2.4038828557 | 3.7604066694 |
| C | 1.3319923053  | 4.0938241385 | 3.6324288651 |
| C | 2.2658664034  | 1.8568469884 | 3.7265712678 |
| C | 1.1550465065  | 2.7053667399 | 3.6594950187 |
| H | 2.7517074086  | 5.7118356124 | 3.6316147063 |
| H | 4.4109755725  | 1.7371334049 | 3.7971518625 |
| H | 0.4621812202  | 4.7528714073 | 3.5653355602 |
| H | 2.1079669808  | 0.7780556756 | 3.7336774540 |
| H | -0.7607705533 | 2.8108635446 | 3.4894407354 |
| H | 4.7395216266  | 4.2115582412 | 3.7418677187 |



**PHE...GN**

|   |               |              |              |
|---|---------------|--------------|--------------|
| C | 1.2331538110  | 0.7098371920 | 0.2821643256 |
| C | 0.0003989054  | 1.4211848909 | 0.2875696765 |
| C | 0.0006856775  | 2.8444486770 | 0.2828403261 |
| C | -1.2323993239 | 3.5556831113 | 0.2866103207 |
| C | -1.2323862941 | 4.9789634818 | 0.2864831357 |
| C | -2.4652900128 | 5.6903265055 | 0.2848663818 |
| C | -2.4648995817 | 7.1137618060 | 0.2860593073 |
| C | -3.6974163807 | 7.8253891328 | 0.2862977514 |
| C | 3.6976027567  | 0.7101695739 | 0.2706616038 |
| C | 2.4654291876  | 1.4217095140 | 0.2666836091 |
| C | 2.4656368242  | 2.8443998301 | 0.2560714393 |
| C | 1.2334074499  | 3.5556102755 | 0.2683752718 |
| C | 1.2332632903  | 4.9785651841 | 0.2733504284 |
| C | 0.0005165331  | 5.6903237155 | 0.2846277319 |
| C | 0.0001256871  | 7.1137518010 | 0.2859064322 |
| C | -1.2323819887 | 7.8258335491 | 0.2833580597 |
| C | 6.1620770085  | 0.7098447981 | 0.2821137684 |
| C | 4.9297925670  | 1.4217188920 | 0.2667103879 |
| C | 4.9296080531  | 2.8444097039 | 0.2562332209 |
| C | 3.6976138909  | 3.5557109708 | 0.2499336019 |
| C | 3.6976435250  | 4.9783208446 | 0.2579559356 |
| C | 2.4656341540  | 5.6899597285 | 0.2694860843 |
| C | 2.4652012458  | 7.1131535282 | 0.2834898849 |
| C | 1.2326842038  | 7.8253883222 | 0.2861579829 |
| C | 8.6276145827  | 0.7095055443 | 0.2918876893 |
| C | 7.3948386111  | 1.4211849303 | 0.2876246444 |
| C | 7.3945425451  | 2.8444539132 | 0.2830672432 |
| C | 6.1617987621  | 3.5556245834 | 0.2687187026 |
| C | 6.1619965020  | 4.9785793117 | 0.2737266944 |
| C | 4.9296361883  | 5.6899623645 | 0.2696978547 |
| C | 4.9300713578  | 7.1131671498 | 0.2835723987 |
| C | 3.6976469892  | 7.8250659002 | 0.2880988128 |
| C | 4.9453628788  | 4.0738196971 | 3.7140868144 |
| C | 3.7835532234  | 4.8502078496 | 3.7129834885 |
| C | 4.8533423311  | 2.6794282979 | 3.7157947041 |
| C | 2.5299691405  | 4.2326021672 | 3.7148969898 |
| C | 3.6000667228  | 2.0614966985 | 3.7175746233 |
| C | 2.4384891662  | 2.8383453573 | 3.7167409636 |
| H | 3.8548195334  | 5.9391109611 | 3.6959975175 |
| H | 5.7606584829  | 2.0731604348 | 3.7005430768 |
| H | 1.6228921826  | 4.8389619361 | 3.6996591475 |
| H | 3.5283969504  | 0.9726932447 | 3.7049333673 |
| H | 5.9241158473  | 4.5560199578 | 3.6980700268 |
| H | 1.4598488133  | 2.3555136719 | 3.7026365722 |
